# Supplementary material for: Gestational weight gain in 4 low- and middle-income countries and associations with birth outcomes: a secondary analysis of the Women First Trial
Source: PubMed Central journal article supplement (PMC8326045; doi:10.1093/ajcn/nqab086), 2021-04-19
Supplement: nqab086_supplemental_file.pdf [file nqab086_supplemental_file.pdf]

**Title:** Gestational weight gain in four low- and middle-income countries in the Women First Trial and associations with birth outcomes

**First Author:** Melissa Bauserman

**Online Supplemental Material**

**Supplemental Table 1.** Gestational weight gain (GWG) velocity and Z-scores by demographics in subset of sample with accurate gestational age dating

| Variable                                 | N    | Weight Gain Velocity <sup>1</sup><br>(kg/wk) | Weight Gain<br>Z-score <sup>2</sup> |
|------------------------------------------|------|----------------------------------------------|-------------------------------------|
| Site                                     |      |                                              |                                     |
| Guatemala                                | 479  | 0.30 ± 0.14***                               | -1.31 ± 1.14***                     |
| India                                    | 493  | 0.38 ± 0.12                                  | -0.62 ± 0.81                        |
| Pakistan                                 | 447  | 0.30 ± 0.18                                  | -1.45 ± 1.80                        |
| DRC <sup>3</sup>                         | NA   | NA                                           | NA                                  |
| Treatment Arm <sup>4</sup>               |      |                                              |                                     |
| Arm 1                                    | 471  | 0.33 ± 0.15*                                 | -1.10 ± 1.29*                       |
| Arm 2                                    | 505  | 0.34 ± 0.15                                  | -1.02 ± 1.34                        |
| Arm 3                                    | 443  | 0.31 ± 0.16                                  | -1.23 ± 1.42                        |
| Baseline BMI Categories                  |      |                                              |                                     |
| Underweight (<18.5 kg/m <sup>2</sup> )   | 358  | 0.35 ± 0.14***                               | -0.96 ± 1.38***                     |
| Normal (18.5-24.9 kg/m <sup>2</sup> )    | 784  | 0.34 ± 0.15                                  | -1.02 ± 1.30                        |
| Overweight/Obese(≥25 kg/m <sup>2</sup> ) | 276  | 0.27 ± 0.16                                  | -1.58 ± 1.37                        |
| Age, y                                   |      |                                              |                                     |
| <20                                      | 292  | 0.33 ± 0.16**                                | -1.08 ± 1.68**                      |
| 20-24                                    | 599  | 0.34 ± 0.15                                  | -0.99 ± 1.23                        |
| 25+                                      | 528  | 0.31 ± 0.15                                  | -1.27 ± 1.26                        |
| Parity                                   |      |                                              |                                     |
| Nulliparous                              | 295  | 0.32 ± 0.17                                  | -1.17 ± 1.62                        |
| Primi/Multiparous                        | 1124 | 0.33 ± 0.15                                  | -1.10 ± 1.27                        |

Data presented as mean ± SD. Analysis of variance was used for comparisons.

\**P* <0.05, \*\**P* <0.01, \*\*\**P* <0.001 for overall F-test.

<sup>1</sup>Weight gain velocity was defined as the change in weight (kg) between 2 maternal weight measurements, divided by the number of weeks between the two measurements.

<sup>2</sup>Weight gain Z-score was assigned based on GWG and number of weeks gestation using INTERGROWTH-21<sup>st</sup> International Standards for Newborn Size (1).

<sup>3</sup>Democratic Republic of the Congo excluded due to imprecise gestational dating.

<sup>4</sup>Maternal participants in Arm 1 started intervention  $\geq 3$  months prior to conception; Arm 2 started same intervention at  $\sim 12$  wk gestation; and Arm 3 (control) received no study intervention.

kg/wk, kilograms/wk.

**Supplemental Table 2.** Newborn outcomes based on INTERGROWTH-21<sup>st</sup> International Standards (1) by gestational weight Z-score in in subset of sample with accurate gestational age dating by maternal weight category

| <b>Outcome</b>                     | <b>All Sites<sup>1</sup><br/>(N=1,419)</b>  | <b>Guatemala<br/>(N=479)</b>  | <b>India<br/>(N=493)</b>       | <b>Pakistan<br/>(N=447)</b>   |
|------------------------------------|---------------------------------------------|-------------------------------|--------------------------------|-------------------------------|
|                                    | Adj. Mean Dif/RR <sup>2,3</sup><br>(95% CI) | Adj. Mean Diff/RR<br>(95% CI) | Adj. Mean Diff./RR<br>(95% CI) | Adj. Mean Diff/RR<br>(95% CI) |
| <b>Continuous Outcomes</b>         |                                             |                               |                                |                               |
| Length-for-Age Z-score             |                                             |                               |                                |                               |
| All weight categories <sup>4</sup> | 0.06 (0.01, 0.10)**                         | 0.14 (0.07, 0.21)***          | 0.24 (0.12, 0.35)***           | -0.03 (-0.09, 0.04)           |
| Underweight                        | 0.10 (0.01, 0.18)*                          | Non-estimable                 | 0.30 (0.10, 0.50)**            | 0.07 (-0.03, 0.18)            |
| Normal weight                      | 0.06 (0.00, 0.12)*                          | 0.17 (0.05, 0.29)**           | 0.31 (0.16, 0.45)***           | -0.06 (-0.14, 0.03)           |
| Overweight/obese                   | 0.05 (-0.03, 0.13)                          | 0.15 (0.07, 0.24)***          | -0.15 (-0.61, 0.30)            | -0.13 (-0.54, 0.28)           |
| Weight-for-Age Z-score             |                                             |                               |                                |                               |
| All weight categories <sup>4</sup> | 0.05 (0.01, 0.09)**                         | 0.10 (0.03, 0.16)**           | 0.21 (0.11, 0.32)***           | 0.01 (-0.04, 0.07)            |
| Underweight <sup>4</sup>           | 0.05 (-0.02, 0.13)                          | Non-estimable                 | 0.31 (0.15, 0.47)***           | 0.03 (-0.06, 0.13)            |
| Normal weight                      | 0.07 (0.02, 0.12)**                         | 0.14 (0.03, 0.24)**           | 0.30 (0.16, 0.43)***           | 0.02 (-0.05, 0.10)            |
| Overweight/obese                   | 0.05 (-0.02, 0.12)                          | 0.12 (0.04, 0.20)**           | -0.13 (-0.60, 0.34)            | -0.02 (-0.32, 0.29)           |
| <b>Categorical Outcomes</b>        |                                             |                               |                                |                               |
| Small for gestational age          |                                             |                               |                                |                               |
| All weight categories <sup>4</sup> | 0.96 (0.92, 1.00)                           | 0.83 (0.74, 0.93)**           | 0.87 (0.76, 1.00)              | 0.95 (0.90, 1.00)*            |
| Underweight                        | 0.93 (0.90, 0.97)***                        | --                            | --                             | --                            |
| Normal weight                      | 0.93 (0.87, 1.00)*                          | --                            | --                             | --                            |
| Overweight/obese                   | 0.90 (0.79, 1.03)                           | --                            | --                             | --                            |
| Low birth weight                   |                                             |                               |                                |                               |
| All weight categories <sup>4</sup> | 0.94 (0.89, 1.00)*                          | 0.80 (0.71, 0.90)***          | 0.76 (0.64, 0.89)***           | 0.99 (0.92, 1.07)             |
| Underweight                        | 0.91 (0.85, 0.98)**                         | --                            | --                             | --                            |
| Normal weight                      | 0.92 (0.85, 0.99)*                          | --                            | --                             | --                            |
| Overweight/obese                   | 0.86 (0.71, 1.04)                           | --                            | --                             | --                            |

### Preterm Birth

|                                    |                     |                      |                   |                   |
|------------------------------------|---------------------|----------------------|-------------------|-------------------|
| All weight categories <sup>4</sup> | 0.87 (0.79, 0.86)** | 0.68 (0.60, 0.78)*** | 0.92 (0.62, 1.36) | 0.98 (0.87, 1.11) |
| Underweight                        | 0.89 (0.79, 0.99)*  | --                   | --                | --                |
| Normal weight                      | 0.88 (0.76, 1.02)   | --                   | --                | --                |
| Overweight/obese                   | 0.80 (0.67, 0.95)*  | --                   | --                | --                |

---

Note: Models for categorical outcomes could not be run by site and BMI due to small sample sizes.

<sup>1</sup>Democratic Republic of the Congo excluded due to imprecise gestational dating.

<sup>2</sup>Adjusted mean difference is calculated for continuous outcomes (length and weight) and adjusted relative risk for categorical outcomes (low birth weight, preterm birth, and small for gestational age).

<sup>3</sup>Mixed effect regression models were fit, using linear models for continuous outcomes. All models are adjusted for treatment arm, age, parity, weight gain from baseline to 12 weeks gestation, and site. \*  $P < 0.05$ , \*  $P < 0.01$ , \*\*\*  $P < 0.001$ .

<sup>4</sup>Weight categories are defined based on BMI ( $\text{kg}/\text{m}^2$ ): underweight (BMI  $< 18.5$ ), normal weight (BMI 18.5-24.9), and overweight/obese (BMI  $\geq 25$ ).

## REFERENCE FOR SUPPLEMENTAL MATERIAL

INTERGROWTH-21st Project. International Standards for Newborn Size. 2018. Internet: <https://intergrowth21.tghn.org/newborn-size-birth/> accessed April 2020.
